# Supplementary material for: Competition between RNA-binding proteins CELF1 and HuR modulates MYC translation and intestinal epithelium renewal
Source: PubMed Central journal article supplement — Mol Biol Cell. 2015 May 15;26(10):1797–810. doi: 10.1091/mbc.E14-11-1500 (PMC4436827; doi:10.1091/mbc.e14-11-1500), 2015-05-15
Supplement: supp_E14-11-1500v1_CombinedSupMats.pdf [file supp_E14-11-1500v1_CombinedSupMats.pdf]

# Supplemental Materials

*Molecular Biology of the Cell*

Liu et al.

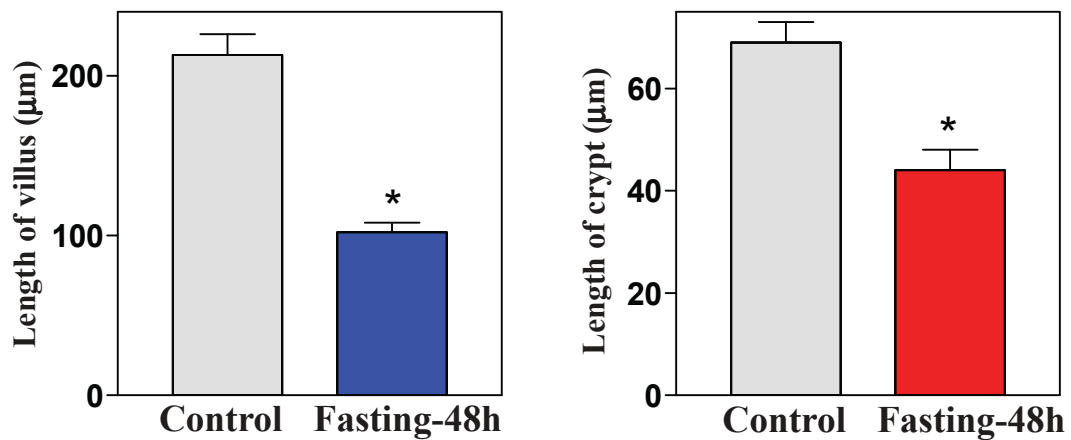

**Supplementary Figure 1.** Changes in the length of villi (*left*) and crypt (*right*) of the small intestinal mucosa in mice fasted for 48 h. Values are shown as the means  $\pm$  SEM from data from six samples. \*  $P < 0.05$  compared with control.

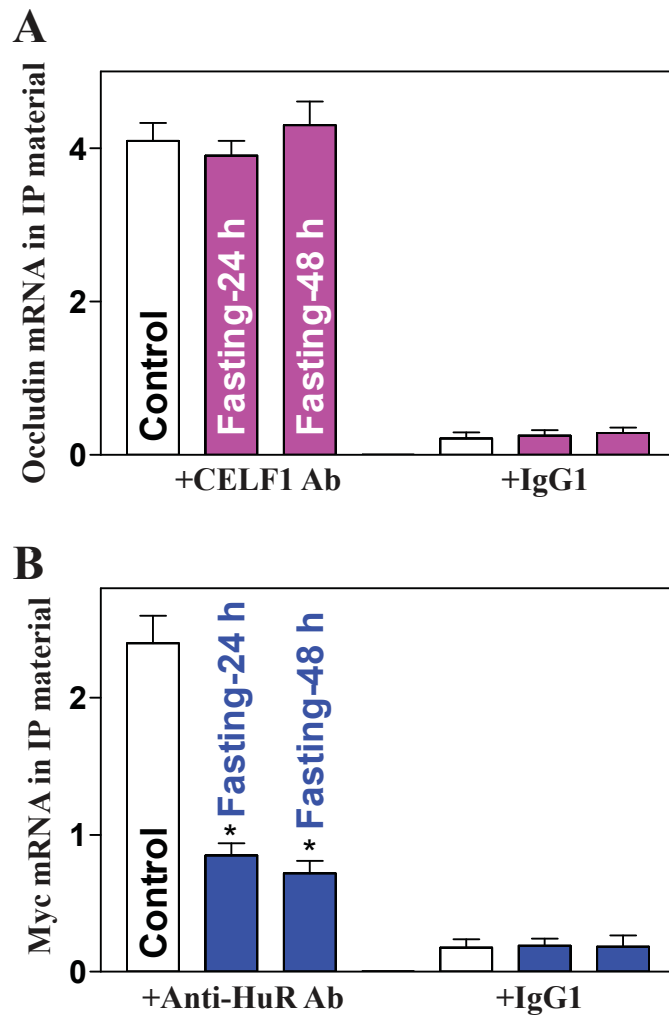

**Supplementary Figure 2.** Fasting fails to alter CELF1 interaction with occludin mRNA (A) but inhibits HuR association with the *Myc* mRNA (B) in small intestinal mucosa. After immunoprecipitation (IP) of RNA-protein complexes using either anti-CELF1 antibody (Ab), anti-HuR Ab or control IgG1, mRNAs were isolated and measured by qRT-PCR analysis. Values are the means  $\pm$  SEM ( $n = 5$ ). \*  $P < 0.05$  compared with control.

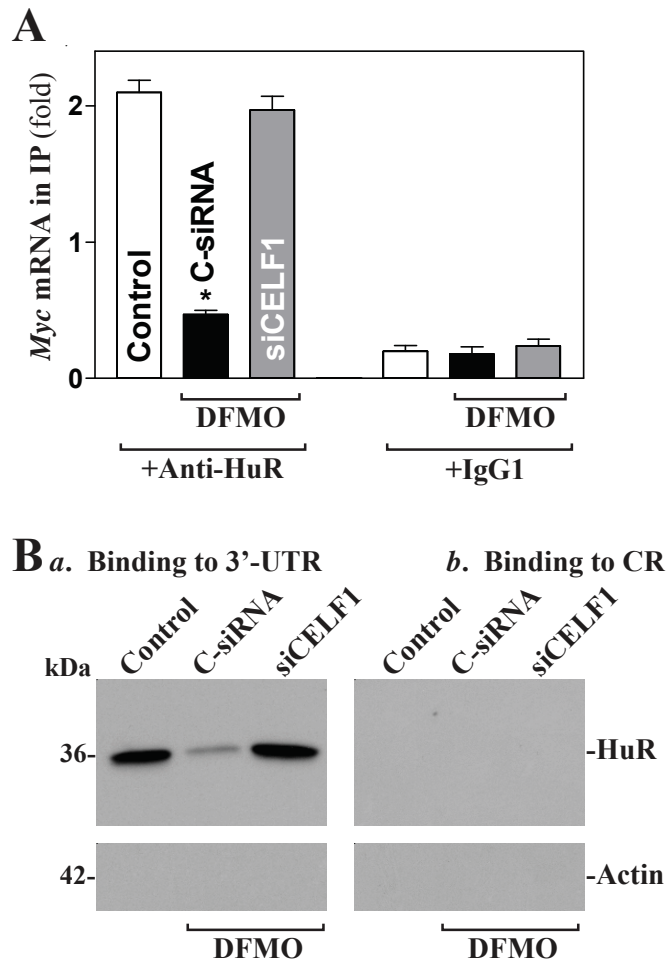

**Supplementary Figure 3.** CELF1 silencing increases HuR association with the *Myc* mRNA in polyamine-deficient cells. **(A)** Association of endogenous HuR with endogenous the *Myc* mRNA as measured by RNP-IP/qRT-PCR analysis. Results were expressed as the means  $\pm$  SEM from three separate experiments.  $*P < 0.05$  compared with control or cells transfected with siCELf1. **(B)** Representative HuR immunoblots using the pull-down materials by biotinylated transcripts of the *Myc* 3'-UTR (*a*) or CR (*b*).

## Supplementary Table-1:

### Possible CELF1- and HuR-binding sites in the F2 of *Myc* 3'-UTR

2041      tgctca aagttaaggc ataaaagaac *ttttttttat* gcttcccatc ttctttcttt  
2101 ttcctttaac agatttgat *ttaattgttt tttttaaaaa* aatcttccgg tgcacatagg  
2161 gcctttaaat gtaataact ttaataaac gttataaca gttatacaag at

Underline, CELF1-binding sites

*Red italic*, HuR-binding site
